# Supplementary material for: Cdc6 degradation requires phosphodegron created by GSK-3 and Cdk1 for SCFCdc4 recognition in Saccharomyces cerevisiae
Source: PubMed Central journal article supplement — Mol Biol Cell. 2015 Jul 15;26(14):2609–19. doi: 10.1091/mbc.E14-07-1213 (PMC4501359; doi:10.1091/mbc.e14-07-1213), 2015-07-15
Supplement: supp_E14-07-1213v1_CombinedSupMats.pdf [file supp_E14-07-1213v1_CombinedSupMats.pdf]

# Supplemental Materials

*Molecular Biology of the Cell*

Al-Zain et al.

Table S1 Yeast strains used in this study

| <b>Strain</b> | <b>Genotype</b>                                                                                   | <b>Source</b>       |
|---------------|---------------------------------------------------------------------------------------------------|---------------------|
| RUY004        | <i>MATa bar1 ORC6-wt::LEU2 lys2 ade2 ura3 leu2 his3 trp1 can1</i>                                 | GW185-3-2 (S. Bell) |
| RUY005        | <i>MATa bar1 ORC6-rlx::LEU2 lys2 ade2 ura3 leu2 his3 trp1 can1</i>                                | GW186-3-2 (S. Bell) |
| RUY006        | <i>MATa bar1 ORC6-ps::LEU2 lys2 ade2 ura3 leu2 his3 trp1 can1</i>                                 | GW187-3-2 (S. Bell) |
| RUY007        | <i>MATa bar1 ORC6-rlx,ps::LEU2 lys2 ade2 ura3 leu2 his3 trp1 can1</i>                             | GW188-3-2 (S. Bell) |
| BCY347        | <i>MATalpha ORC6-wt::LEU2 URA3::GAL-CDC6ΔNT-HA(s) ADE2 ura3 leu2 his3 trp1 can1-100</i>           | This study          |
| BCY348        | <i>MATa ORC6-rlx::LEU2 URA3::GAL-CDC6ΔNT-HA(s) ADE2 ura3 leu2 his3 trp1 can1-100</i>              | This study          |
| BCY349        | <i>MATa ORC6-ps::LEU2 URA3::GAL-CDC6ΔNT-HA(s) ADE2 ura3 leu2 his3 trp1 can1-100</i>               | This study          |
| BCY350        | <i>MATa ORC6-rlx,ps::LEU2 URA3::GAL-CDC6ΔNT-HA(s) ADE2 ura3 leu2 his3 trp1 can1-100</i>           | This study          |
| BCY351        | <i>MATa ORC6-wt::LEU2 URA3::GAL-CDC6ΔNT-T368A-HA(s) ade2 ura3 leu2 his3 trp1 can1-100</i>         | This study          |
| BCY352        | <i>MATalpha LEU2::ORC6-rlx URA3::GAL-CDC6ΔNT-T368A-HA(s) ade2 ura3 leu2 his3 trp1 can1-100</i>    | This study          |
| BCY353        | <i>MATalpha LEU2::ORC6-ps URA3::GAL-CDC6ΔNT-T368A-HA(s) ade2 ura3 leu2 his3 trp1 can1-100</i>     | This study          |
| BCY354        | <i>MATalpha LEU2::ORC6-rlx,ps URA3::GAL-CDC6ΔNT-T368A-HA(s) ade2 ura3 leu2 his3 trp1 can1-100</i> | This study          |
| BCY234        | <i>MATa bar1 URA3::GAL-CDC6-HA(s) ADE2 ura3 leu2 his3 trp1 can1-100</i>                           | This study          |
| BCY235        | <i>MATa bar1 URA3::GAL-CDC6-T368A-HA(s) ADE2 ura3 leu2 his3 trp1 can1-100</i>                     | This study          |
| BCY360        | <i>MATa bar1 URA3::GAL-CDC6-P369-HA(s) ADE2 ura3 leu2 his3 trp1 can1-100</i>                      | This study          |
| BCY335        | <i>MATa bar1 URA3::GAL-CDC6-P372-HA(s) ADE2 ura3 leu2 his3 trp1 can1-100</i>                      | This study          |
| BCY333        | <i>MATa bar1 URA3::GAL-CDC6-P373A-HA(s) ADE2 ura3 leu2 his3 trp1 can1-100</i>                     | This study          |
| BCY412        | <i>MATa bar1 URA3::GAL-CDC6-T39A-HA(s) ADE2 ura3 leu2 his3 trp1 can1-100</i>                      | This study          |
| BCY416        | <i>MATa bar1 URA3::GAL-CDC6-S43A-HA(s) ADE2 ura3 leu2 his3 trp1 can1-100</i>                      | This study          |
| BCY420        | <i>MATa bar1 URA3::GAL-CDC6-T39A,T368A-HA(s) ADE2 ura3 leu2 his3 trp1 can1-100</i>                | This study          |
| BCY372        | <i>MATa bar1 URA3::GAL-CDC6-T368A,S372A(s)-HA ADE2 ura3 leu2 his3 trp1 can1-100</i>               | This study          |
| BCY254        | <i>MATa bar1 mck1::KanMX URA3::GAL-CDC6-HA(s) ADE2 ura3 leu2 his3 trp1 can1-100</i>               | This study          |
| RUY508        | <i>MATa bar1 ADE2 ura3 leu2 his3 trp1 can1-100</i>                                                | F. Cross            |
| BCY260        | <i>MATa ORC6-rlx-LEU2 ade2 ura3 leu2 his3 trp1 can1-100</i>                                       | F. Cross            |
| BCY426        | <i>MATa ORC6-rlx-LEU2 URA3::GAL-CDC6-HA(s) ade2 ura3 leu2 his3 trp1 can1-100</i>                  | This study          |
| BCY508        | <i>MATa ORC6-rlx::LEU2 URA3::GAL-CDC6-T368A-HA(s) ade2 ura3 leu2 his3 trp1 can1-100</i>           | This study          |
| BCY383        | <i>MATa ORC6-rlx::LEU2 URA3::GAL-CDC6-P369A-HA(s) ade2</i>                                        | This study          |

|        |                                                                                               |                                                       |
|--------|-----------------------------------------------------------------------------------------------|-------------------------------------------------------|
|        | <i>ura3 leu2 his3 trp1 can1-100</i>                                                           |                                                       |
| BCY516 | <i>MATa ORC6-rlx::LEU2 URA3::GAL-CDC6-S372A-HA(s) ade2 ura3 leu2 his3 trp1 can1-100</i>       | This study                                            |
| BCY518 | <i>MATa ORC6-rlx::LEU2 URA3::GAL-CDC6-P373A-HA(s) ade2 ura3 leu2 his3 trp1 can1-100</i>       | This study                                            |
| BCY380 | <i>MATa ORC6-rlx::LEU2 URA3::GAL-CDC6-T368A,S372A-HA(s) ade2 ura3 leu2 his3 trp1 can1-100</i> | This study                                            |
| BCY403 | <i>MATa ORC6-rlx::LEU2 URA3::GAL-CDC6-T39A-HA(s) ade2 ura3 leu2 his3 trp1 can1-100</i>        | This study                                            |
| BCY434 | <i>MATa ORC6-rlx::LEU2 URA3::GAL-CDC6-S43A-HA(s) ade2 ura3 leu2 his3 trp1 can1-100</i>        | This study                                            |
| BCY430 | <i>MATa ORC6-rlx::LEU2 URA3::GAL-CDC6-T39A,T368A-HA(s) ade2 ura3 leu2 his3 trp1 can1-100</i>  | This study                                            |
| BCY514 | <i>MATalpha URA3::GAL-CDC6-HA RAD52-YFP ADE2 ura3 leu2 his3 trp1</i>                          | This study (RAD52-YFP from R. Rothstein 2001)         |
| BCY515 | <i>MATalpha URA3::GAL-CDC6-T368A-HA RAD52-YFP ADE2 ura3 leu2 his3 trp1</i>                    | This study (RAD52-YFP from R. Rothstein 2001)         |
| BCY545 | <i>MATalpha URA3::GAL-CDC6-T39A,T368A-HA RAD52-YFP ADE2 ura3 leu2 his3 trp1</i>               | This study (RAD52-YFP from R. Rothstein 2001)         |
| BCY356 | <i>MATa bar1::hisG GAL-CLB2-TAP::URA ade2 ura3 leu2 his3 trp1 can1-100</i>                    | DOM0073 (D. Morgan)                                   |
| BCY397 | <i>MATa bar1::hisG GAL-MCK1-TAP::URA ade2 ura3 leu2 his3 trp1 can1-100</i>                    | POM638 (D. Morgan) transformed into BCY355            |
| BCY355 | <i>MATa bar1::hisG ade2 ura3 leu2 his3 trp1 can1-100</i>                                      | DOM0090 (D. Morgan)                                   |
| BCY450 | <i>MATa URA3::GAL-CDC6-HA(s) clb2::LEU2 ade2 ura3 leu2 his3 trp1 can1-100</i>                 | This study                                            |
| BCY448 | <i>MATa URA3::GAL-CDC6-HA(s) clb4::HIS3 ade2 ura3 leu2 his3 trp1 can1-100</i>                 | This study                                            |
| BCY454 | <i>MATa URA3::GAL-CDC6-HA(s) clb5::HIS3 ade2 ura3 leu2 his3 trp1 can1-100</i>                 | This study                                            |
| BCY357 | <i>MATa bar1 MCK1-9MYC::TRP ADE2 ura3 leu2 his3 trp1 can1-100</i>                             | A. Ikui 2012                                          |
| BCY368 | <i>MATa bar1 MCK1-GFP::HIS3 ADE2 ura3 leu2 his3 trp1 can1-100</i>                             | VR1328 (S. Yoshida) backcrossed with W303 three times |
| BCY539 | <i>MATa GAL-CDC6-Δ370Δ371-HA ADE2 ura3 leu2 his3 trp1 can1-100</i>                            | This study                                            |
| BCY476 | <i>MATa GAL-CDC6-Δ370-HA ADE2 ura3 leu2 his3 trp1 can1-100</i>                                | This study                                            |
| BCY488 | <i>MATa GAL-CDC6-T370A-HA ADE2 ura3 leu2 his3 trp1 can1-100</i>                               | This study                                            |
| BCY542 | <i>MATa GAL-CDC6-T371A-HA ADE2 ura3 leu2 his3 trp1 can1-100</i>                               | This study                                            |
| BCY077 | <i>MATa bar1 CDC6-prA::HIS3 ade2 ura3 leu2 his3 trp1 can1-100</i>                             | F. Cross (2003)                                       |
| BCY577 | <i>MATa bar1 CDC6-T368A-prA::HIS3 ade2 ura3 leu2 his3 trp1 can1-100</i>                       | This study                                            |
| BCY078 | <i>MATa bar1 mck1::KanMX CDC6-prA::HIS3 ade2 ura3 leu2 his3 trp1 can1-100</i>                 | A. Ikui 2012                                          |
| RUY269 | <i>MATa CLB2-9MYC-TRP1 ORC6-PrA-HIS3 ade2 ura3 leu2 his3 trp1 can1-100</i>                    | F. Cross                                              |
| BCY577 | <i>MATa bar1 CDC6-T368A-prA::HIS3</i>                                                         | This study                                            |
| BCY282 | <i>MATa cdc4-1 CDC6-prA::HIS3 ura3 leu2 his3 trp1 can1-100</i>                                | This study                                            |
| BCY474 | <i>MATa bar1 dia2::KanMX CDC6-prA::HIS3 ADE2 ura3 leu2 his3 trp1 can1-100</i>                 | This study ( <i>dia2::KanMX</i> from D. Koepf 2012)   |
| BCY475 | <i>MATa bar1 tom1::KanMX CDC6-prA::HIS3 ADE2 ura3 leu2</i>                                    | This study ( <i>tom1::KanMX</i>                       |

|        |                                                                                        |                                               |
|--------|----------------------------------------------------------------------------------------|-----------------------------------------------|
|        | <i>his3 trp1 can1-100</i>                                                              | from D. Koepp 2012)                           |
| BCY512 | <i>MATalpha SIC1-prA::HIS3 RAD52-YFP ADE2 ura3 leu2 his3 trp1</i>                      | This study (RAD52-YFP from R. Rothstein 2001) |
| BCY513 | <i>MATalpha mck1::KanMX SIC1-prA::HIS3 RAD52-YFP ADE2 ura3 leu2 his3 trp1</i>          | This study (RAD52-YFP from R. Rothstein 2001) |
| BCY514 | <i>MATalpha mck1::KanMX RAD52-YFP URA3::GAL-CDC6-HA ADE2 ura3 leu2 his3 trp1</i>       | This study (RAD52-YFP from R. Rothstein 2001) |
| BCY515 | <i>MATalpha mck1::KanMX RAD52-YFP URA3::GAL-CDC6-T368A-HA ADE2 ura3 leu2 his3 trp1</i> | This study (RAD52-YFP from R. Rothstein 2001) |
| BCY600 | <i>MATalpha CDC6-T368A-prA::HIS3 RAD52-YFP ADE2 ura3 leu2 his3 trp1</i>                | This study (RAD52-YFP from R. Rothstein 2001) |
| BCY602 | <i>MATalpha CDC6-T39A-T368A-prA::HIS3 RAD52-YFP ADE2 ura3 leu2 his3 trp1</i>           | This study (RAD52-YFP from R. Rothstein 2001) |
| AAY029 | <i>MATa his3 leu2 met1 ura3 trp1</i>                                                   | This study                                    |
| AAY030 | <i>MATa mre11::KanMX his3 leu2 met1 trp1</i>                                           | This study                                    |
| AAY031 | <i>MATa mre11::KanMX mck1::KanMX his3 leu2 ura3 trp1</i>                               | This study                                    |
| AAY032 | <i>MATa URA3::GAL-CDC6-HA his3 met1</i>                                                | This study                                    |
| AAY033 | <i>MATa URA3::GAL-CDC6-T368A-HA his3 leu2 trp1</i>                                     | This study                                    |
| AAY034 | <i>MATa mre11::KanMX URA3::GAL-CDC6-HA his3 leu2 trp1</i>                              | This study                                    |
| AAY035 | <i>MATa mre11::KanMX URA3::GAL-CDC6-T368A-HA his3 leu2 trp1</i>                        | This study                                    |
| BCY581 | <i>MATa bar1 CDC6-T39A-T368A-prA::HIS3</i>                                             | This study                                    |
| BCY595 | <i>MATa mre11::KanMX CDC6-T368A-prA::HIS3</i>                                          | This study                                    |
| BCY597 | <i>MATa mre11::KanMX CDC6-T39A-T368A-prA::HIS3</i>                                     | This study                                    |

Figure S1

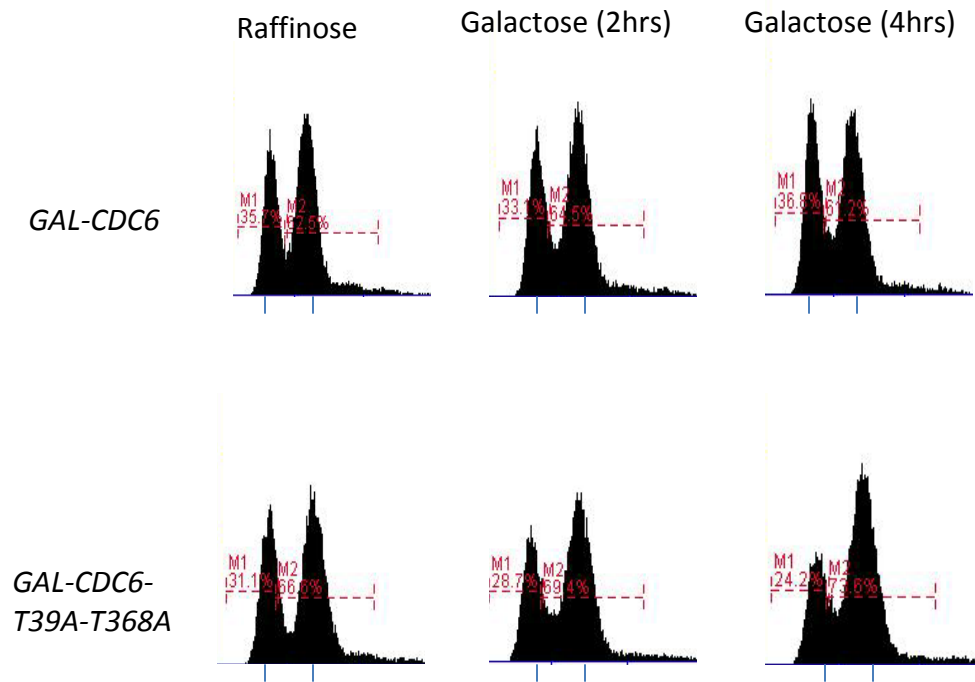

Figure S1. GAL-CDC6-T39A-T368A cells induce mitotic arrest. Cells were incubated in raffinose-containing media first, and used as a sample at time zero. Galactose was added to the media, and samples were collected after 2 hours or 4 hours. Samples were fixed and stained with propidium iodide. FACS analysis was performed to analyze cell cycle patterns.

Figure S2

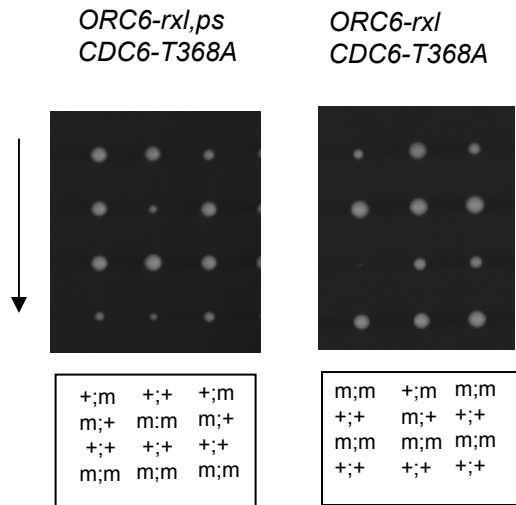

Figure S2. Synthetic lethality between *ORC6* mutants and *CDC6-T368A*. (A) *ORC-x::LEU2::HIS3/ORC6 CDC6-T368A/CDC6-wt* diploid strains were sporulated, tetrads were dissected on YEPD plates, and the plates were incubated for 3 days at 30 degrees. *ORC6* alleles and *CDC6-T368A* were identified based on the markers. In viable spores were genotyped by assuming a 2:2 segregation. The *ORC6-rl*, *ORC6-rl,ps* alleles were indicated above each panel. The presence of *ORC6* mutant allele was marked as (m) and *ORC6* wild type as (+) on the left. The presence of *CDC6-T368A* (m) or *CDC6-wt* (+) was indicated on the right.

Figure S3

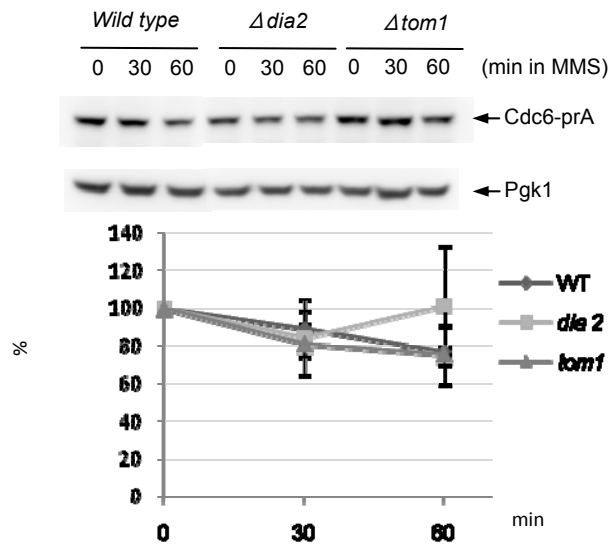

Figure S3 *CDC6-prA*,  $\Delta dia2$  *CDC6-prA* or  $\Delta tom1$  *CDC6-prA* cells were grown to log-phase, then MMS was added to the media (0.1% final). Samples were collected after 0, 30 or 60 minutes. The same experiment was performed three times and Cdc6 protein levels were quantified with the SD.

Figure S4

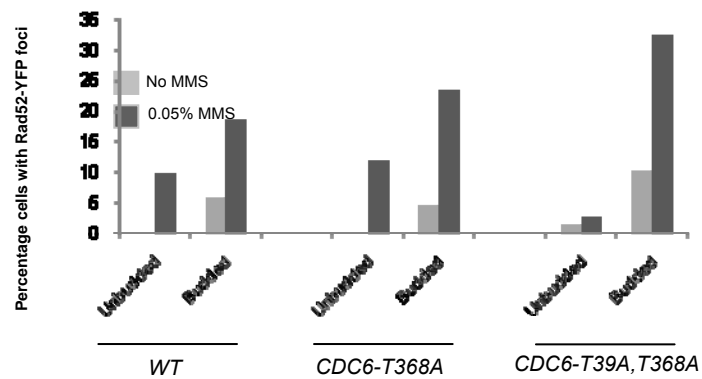

Figure S4. Wild type, *CDC6-T368A* or *CDC6-T39A,T368A* cells were grown to log phase. Cells were incubated for 1 hour in 0.05% MMS and Rad52-YFP foci formation was determined with or without MMS treatment. 100 cells were counted for each experiment.



Figure S5

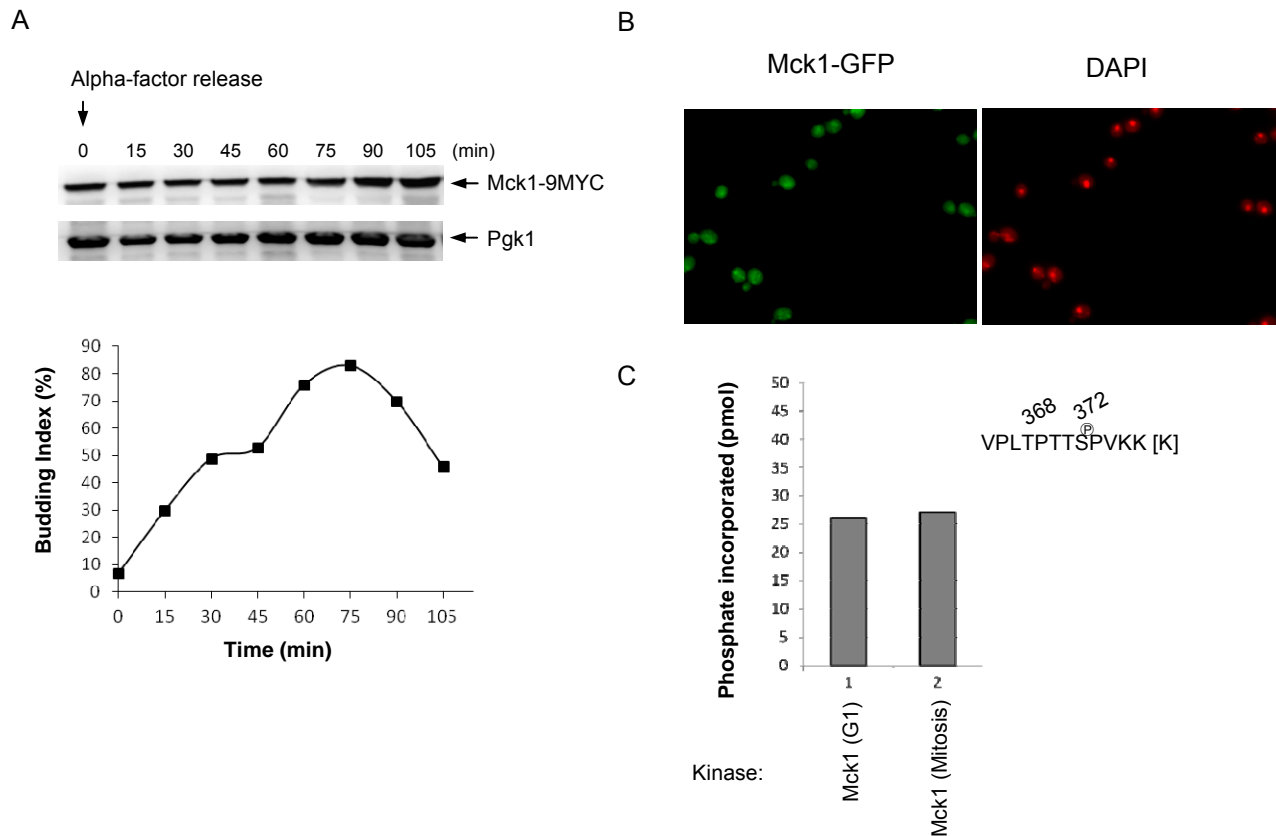

Figure S5. Mck1 phosphorylates the T368 site in Cdc6 after priming by Clb2-Cdk1. (A) To measure Clb2-Cdk1 and Mck1 kinase activities on Cdc6 phosphopeptides, various synthetic peptides of Cdc6 (residues 36-47 or 365-376; shown above) were incubated with purified kinases from asynchronous yeast cultures and  $\gamma$ - $^{32}$ P-ATP. For each kinase, phosphate incorporation was normalized to a control reaction without peptides. Values for the C-terminal peptides represent the average from three independent experiments. (B) Indicated strains were grown in raffinose-containing media first and then galactose was added to induce Cdc6 expression for 2 hours. Nocodazole or alpha-factor was added to the media and incubated for 2 hours. Western blotting was performed using anti-phosphoT368 of Cdc6, anti-HA, anti-Clb2 and anti-Pgk1 antibodies, respectively. (C) Indicated strains were grown in raffinose-containing media first and then galactose was added to induce Cdc6 expression for 2 hours. Nocodazole was added to the media for 2 hours and then western blotting was performed using anti-phosphoT368 of Cdc6, anti-HA, and anti-Pgk1 antibodies, respectively (left). Band intensity of the western blotting for phospho-Cdc6-T368 was quantified and normalized to the total amount of Cdc6 (right).

Figure S6

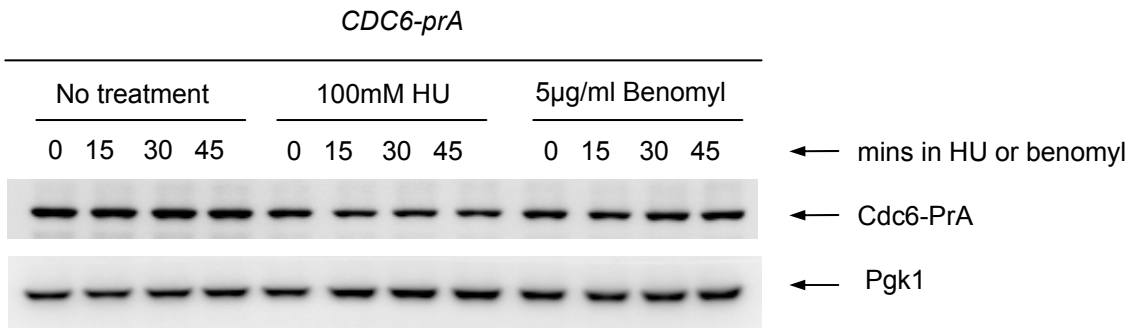

Figure S6. Hydroxyurea or Benomyl treatment does not trigger Cdc6 degradation. *CDC6-prA* cells were incubated in YEPD media to log phase, and hydroxyurea at the final concentration of 100mM or Benomyl at the final concentration of 5µg/ml was added to the media. Samples were taken after 0, 15, 30 or 45 mins, and protein extracts were subjected to western blotting to visualize endogenous Cdc6-prA. Pgk1 was used as a loading control.
